# Supplementary material for: Bioinspired anion exchange membranes with dual steric cross-linking centers for industrial-scale water electrolysis
Source: Royal Society of Chemistry journal article supplement (doi:10.1039/d4ee02428a), 2024-01-01
Supplement: d4ee02428a1.pdf [file d4ee02428a1.pdf]

In Figure S11 of the Supplementary Information, the color of the T1-0.5 and T1-1.0 was labeled incorrectly. The corrected Figure S11 is shown below, and Supplementary Information has been updated with corrected Figure S11. This change does not affect the discussions and conclusions in the paper.

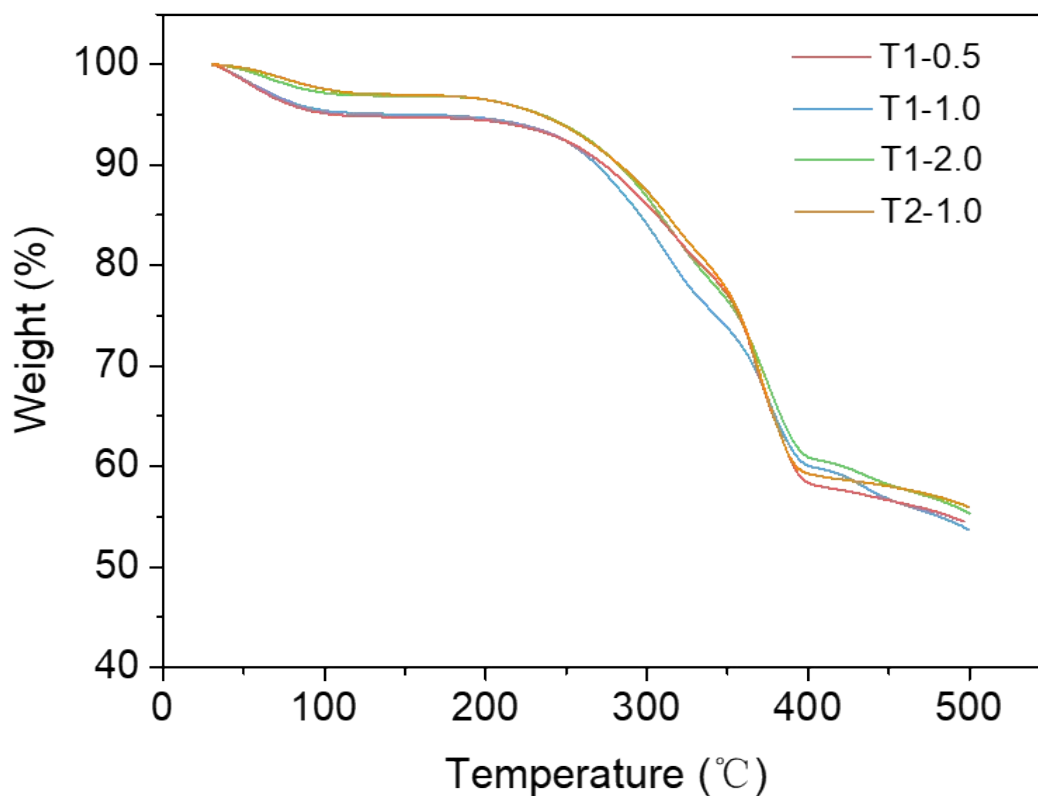

**Figure S11.** The TGA results of T1-0.5, T1-1.0, T1-2.0, and T2-1.0 AEMs.
